# Supplementary material for: The different electronic natures displayed by the alkylthio groups in simple and higher conjugated aniline systems
Source: Royal Society of Chemistry journal article supplement (doi:10.1039/b609506b), 2006-01-01

SUPPORTING INFORMATION FOR

**The different electronic natures displayed by the alkylthio groups in simple and higher conjugated aniline systems**

**Chien-Chung Han,\* R. Balakumar, D. Thirumalai, and Ming-Tsu Chung**

*Department of Chemistry, National Tsing Hua University, Hsinchu, Taiwan, ROC*

*cchan@mx.nthu.edu.tw*

Fig S1 -  $^1\text{H}$  NMR spectrum of monosubstituted-PDA (500 MHz,  $\text{DMSO}-d_6$ )

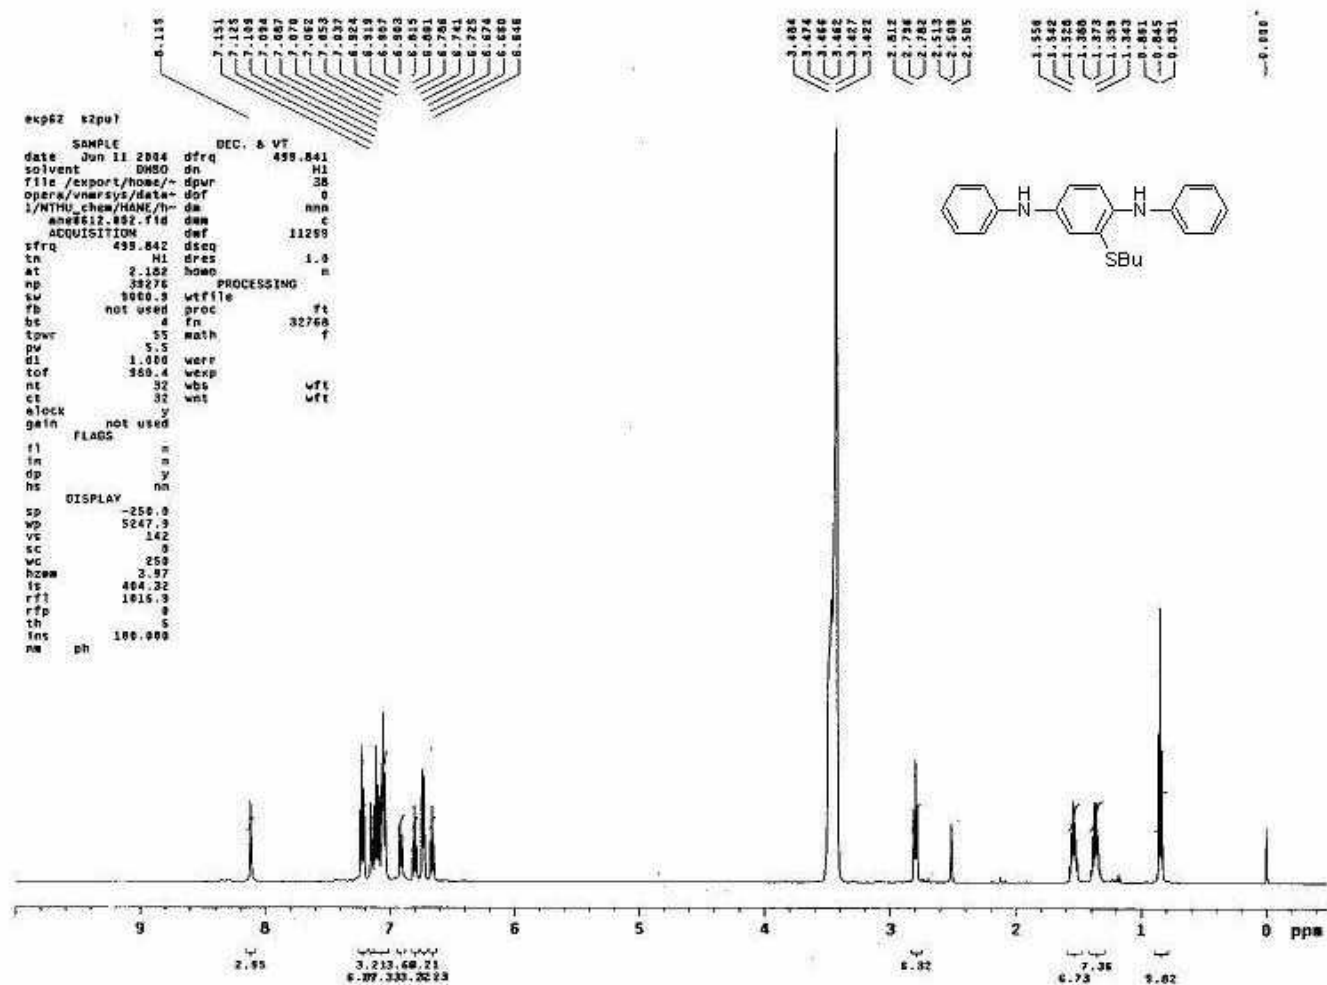

**Fig S2 - Expansion of the aromatic region of mono-PDA (500 MHz, DMSO-*d*<sub>6</sub>)**

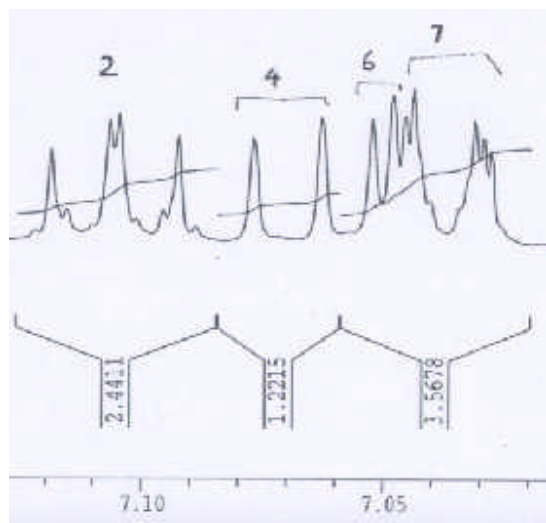

(the protons 2, 4, 6, 7 are better resolved with 600 MHz NMR, in DMSO-*d*<sub>6</sub> and are presented here to support our assignments in this region)

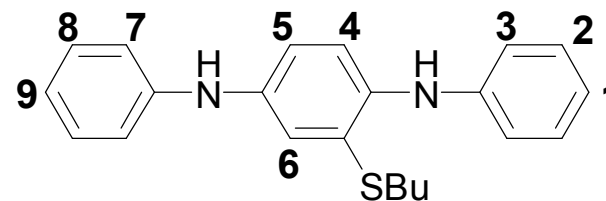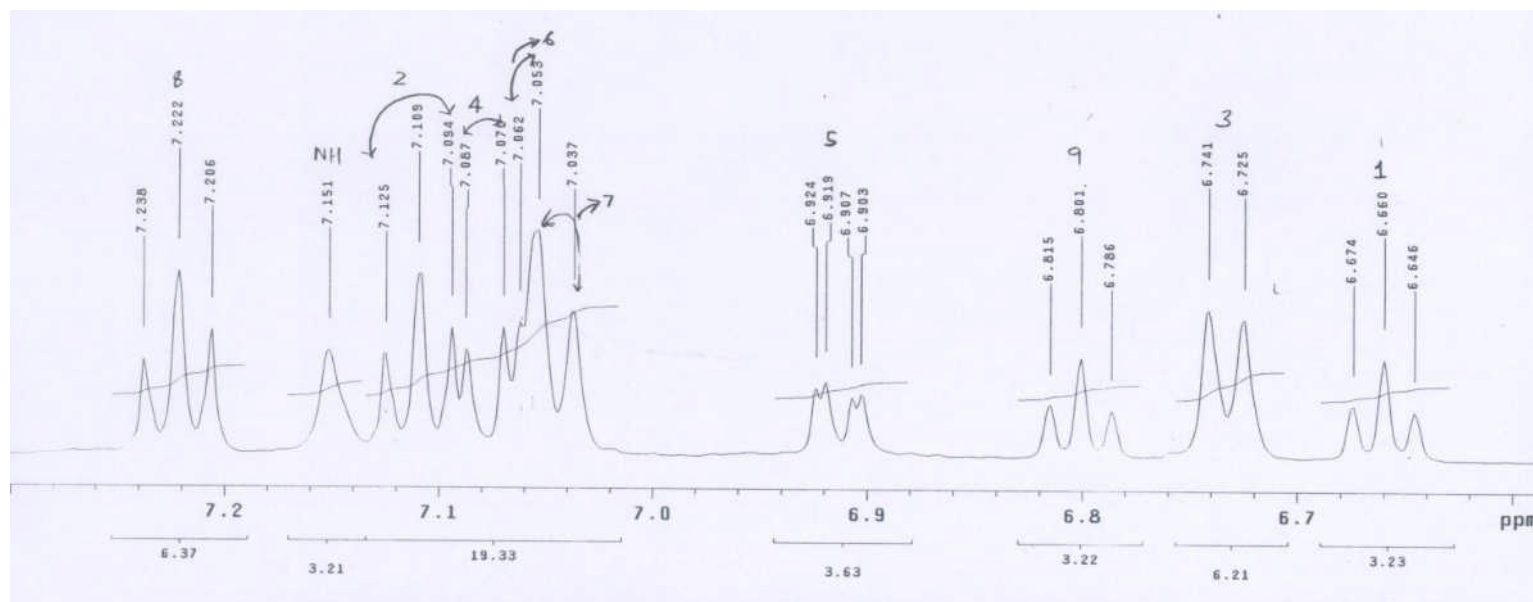

Fig S3 -  $^{13}\text{C}$  NMR spectrum of monosubstituted-PDA (125 MHz,  $\text{DMSO-}d_6$ )

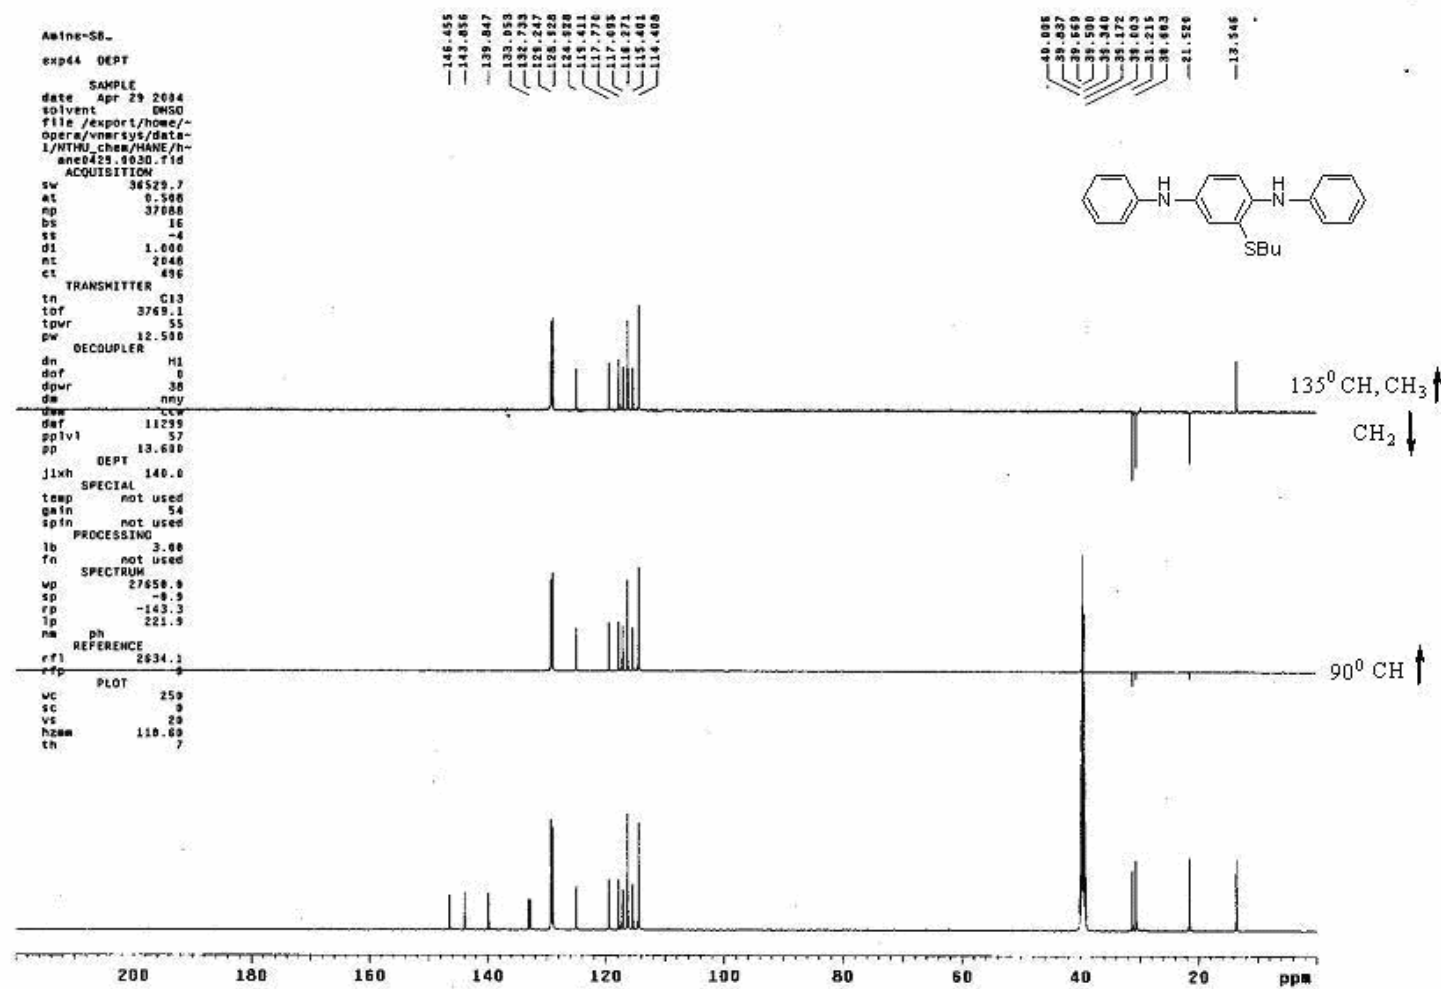

Fig S4 - 2D HETCOR of mono-PDA (500 MHz, DMSO-*d*<sub>6</sub>)

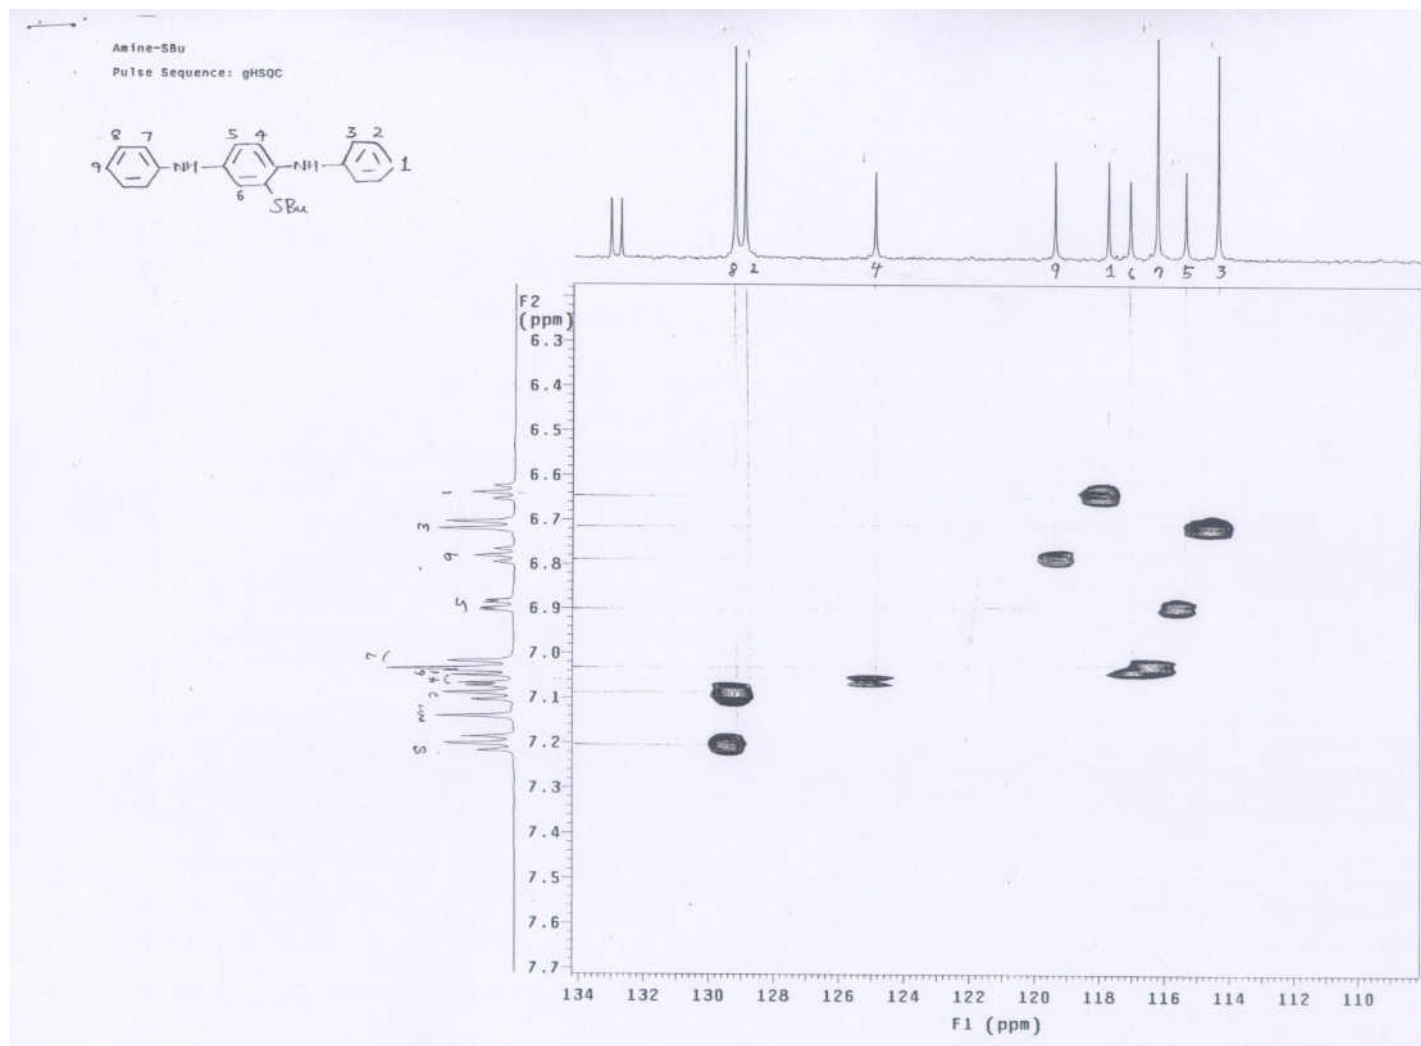

Fig S5- <sup>1</sup>H NMR spectrum of 2,6-disubstituted-PDA (500 MHz, DMSO-*d*<sub>6</sub>)

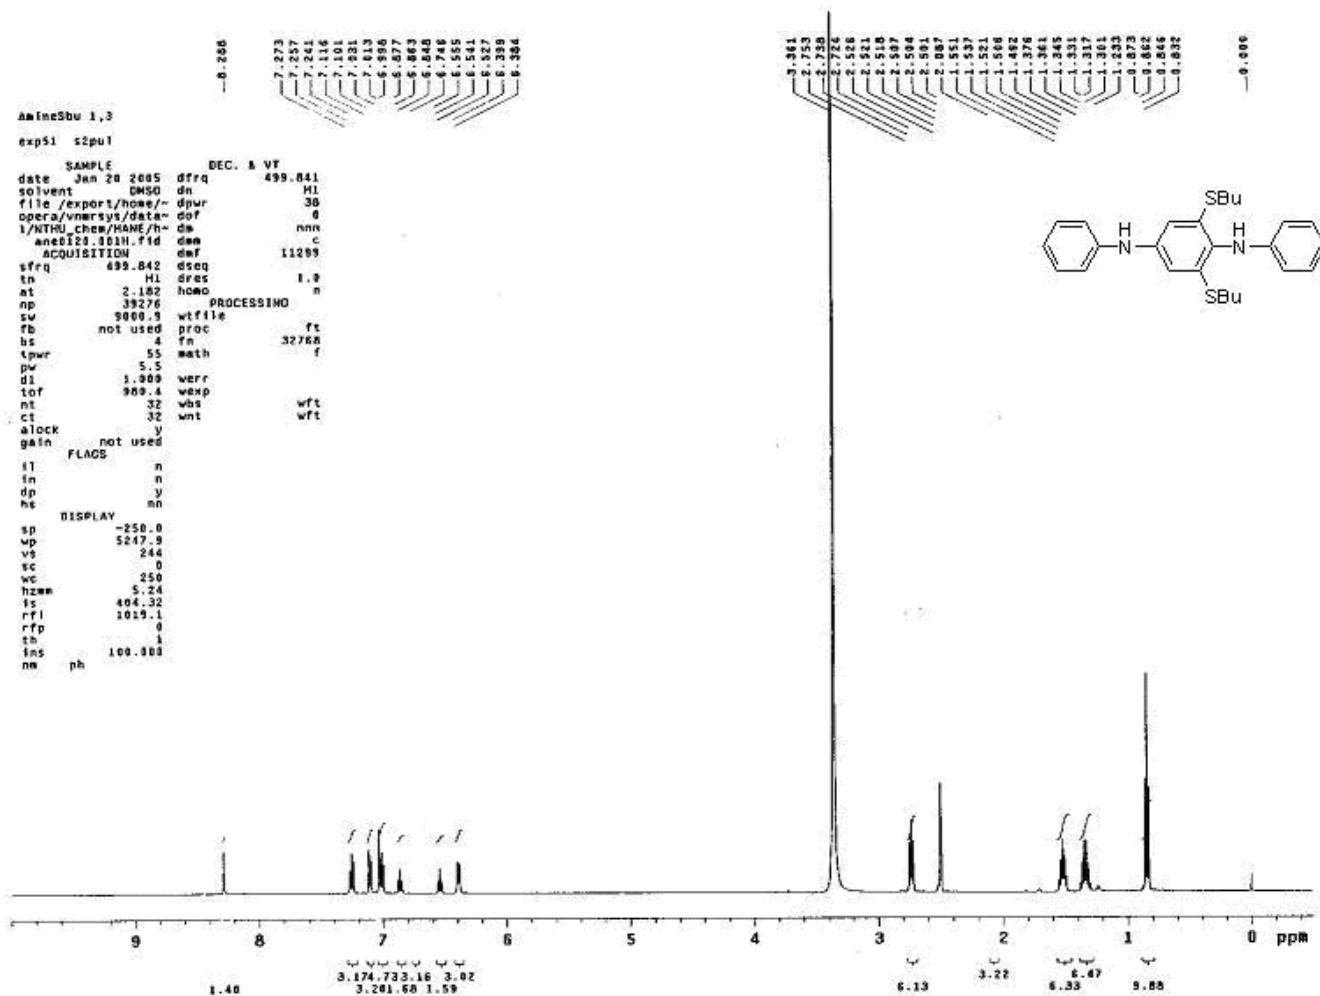

Fig S6 - Expansion of the aromatic region of 2,6-disubstituted PDA

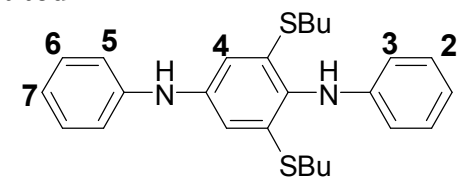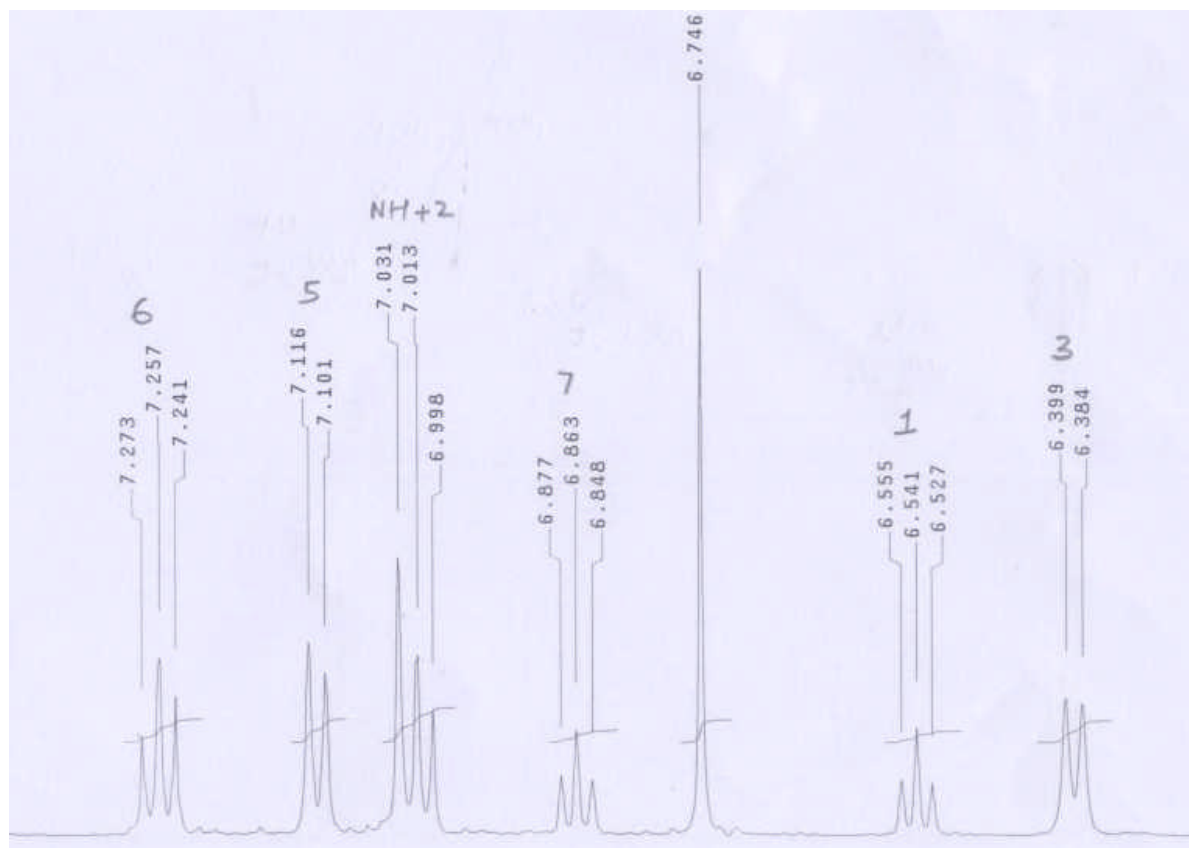

Fig S7 -  $^{13}\text{C}$  of 2,6-disubstituted PDA (500 MHz, DMSO- $d_6$ )

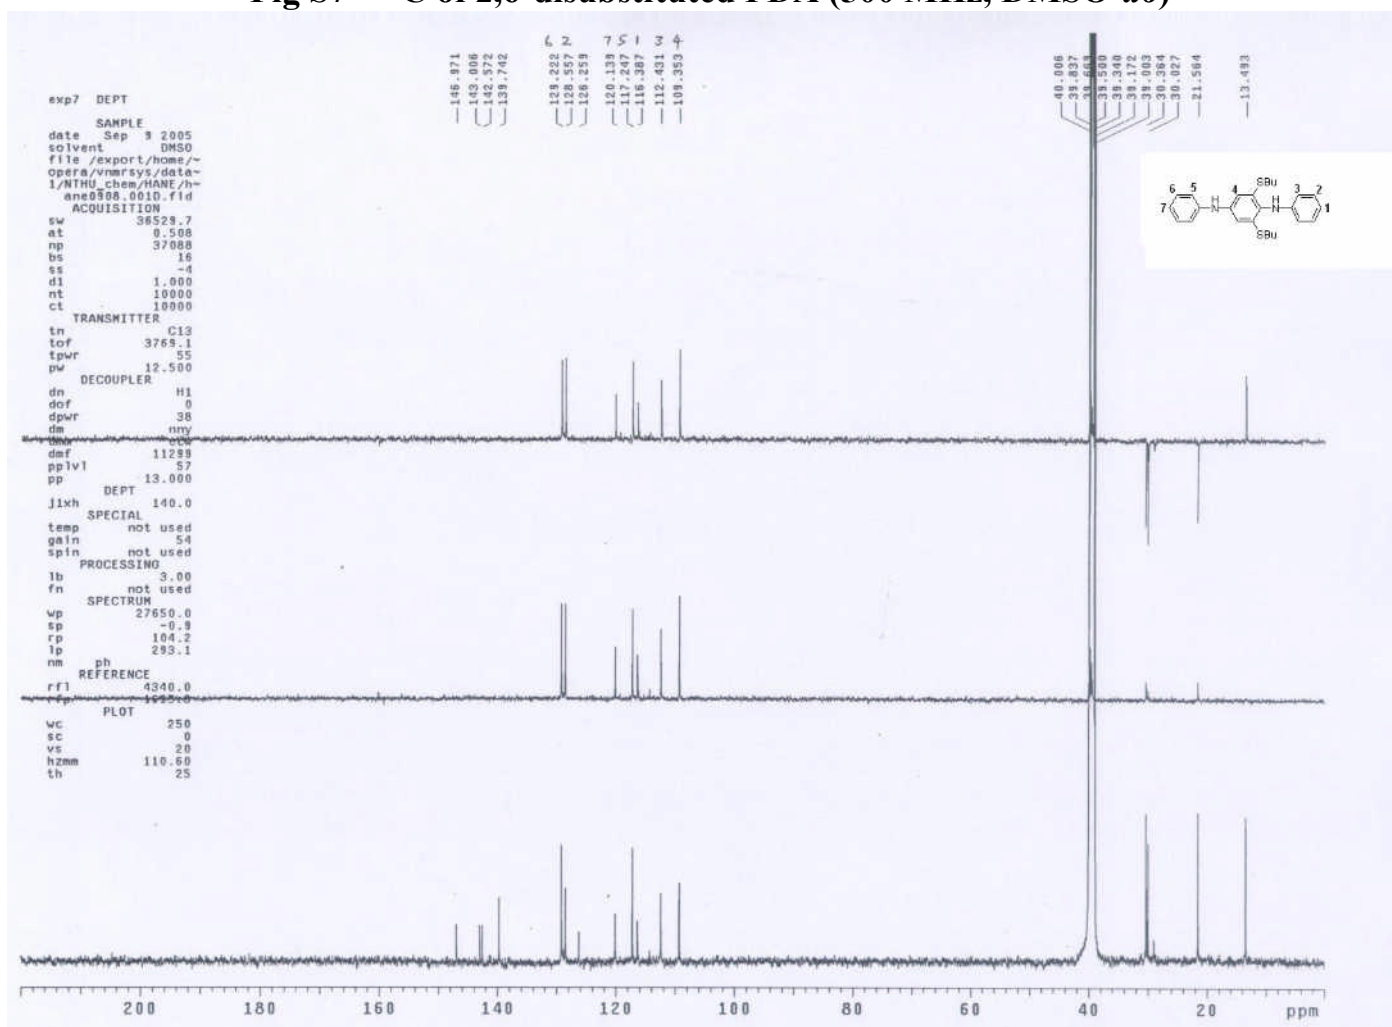



Fig S8 - 2D-HETCOR of 2,6-disubstituted PDA(600 MHz, DMSO-*d*<sub>6</sub>)

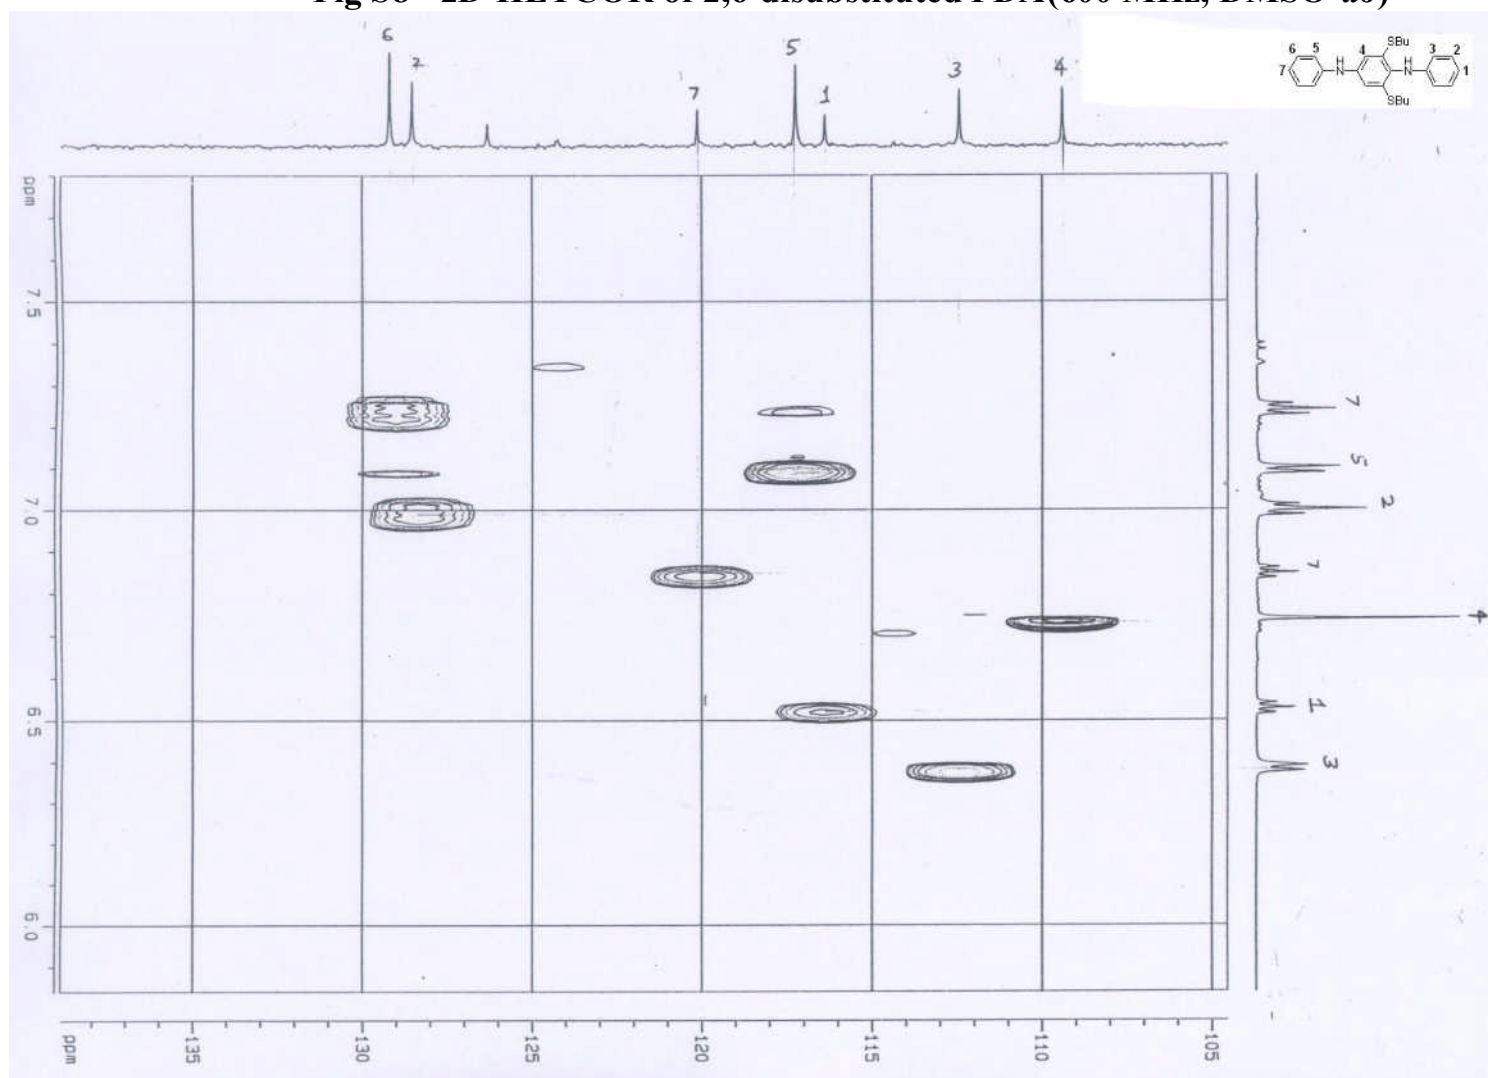

Supplement: b609506b.pdf [file b609506b.pdf]
